# Supplementary material for: Lambda Red-mediated recombinogenic engineering of enterohemorrhagic and enteropathogenic E. coli
Source: Springer Nature journal article supplement (doi:10.1186/1471-2199-4-11), 2003-12-13

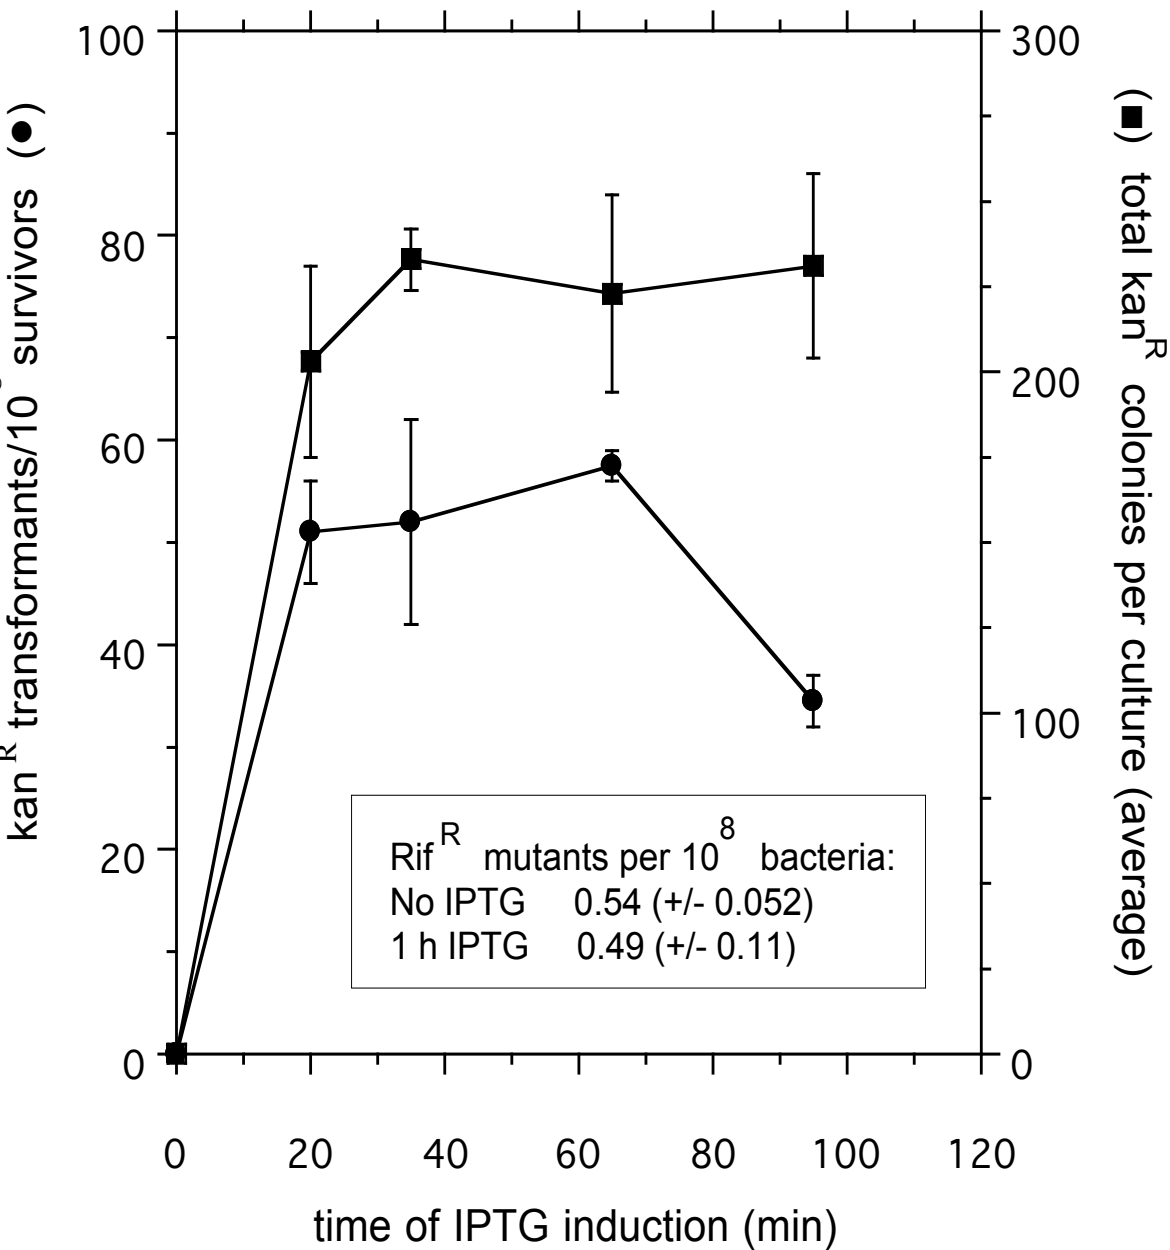

Supplement: 12867_2003_45_MOESM5_ESM.pdf [file 12867_2003_45_MOESM5_ESM.pdf]
